# Supplementary material for: The Number of Patients and Events Required to Limit the Risk of Overestimation of Intervention Effects in Meta-Analysis—A Simulation Study
Source: PLoS One. 2011 Oct 18;6(10):e25491. doi: 10.1371/journal.pone.0025491 (PMC3196500; doi:10.1371/journal.pone.0025491)
Supplement: Appendix S1 — Presents the conventional random-effects model meta-analysis setup and the DerSimonian-Laird random-effects model. (DOC) [file pone.0025491.s018.doc]

# SUPPORTING INFORMATION 1

## Random-effects model meta-analysis

In the meta-analytic framework, the random-effects model is defined as follows.[1-3] Assume we have k independent trials. Let Yi be the estimate of the effect from the individual trials. Let ibe thetrue intervention effect of the *i*th trial, and let i2 denote the variance of i. The trial specific intervention effects are assumed to vary across trials, with an underlying true effect, , and a between-trial variance 2. The random-effects model is defined hierarchically by

Yi = i + i, i ~ N(0**,** i2)

(4)

i =  + Ei, Ei ~ N(0**,** 2)

Collapsing the hierarchy, the observed effect measure, Yi, is then assumed to satisfy the distributional relationship Yi ~ N(**,** i2 + 2), and the trial weights, wi*, are set as the inverse of the individual trial variances, wi* = (i2 + 2)-1. Here we use the asterix to indicate that the weights come from the random-effects model (as opposed to the weights coming from a fixed-effect model wi = i-2). In practice, neither 12, …, k2, nor 2 are known. The within-trial variances are typically often estimated using the sampling variances and the between-trial variance 2 is typically obtained using some estimator (see below).

In the random-effects model meta-analysis the overall intervention effect is obtained as a weighted average of the observed intervention effects in the included trials

w = (i wi*  Yi )/(i wi*)

and the variance is estimated as

Var(w) = 1/(i wi*)

### DerSimonian-Laird random-effects meta-analysis

In the conventional random-effects model approach proposed by DerSimonian and Laird (DL), the between-trial variance is estimated using a method of moments based estimator.[2] Cochran’s homogeneity test statistic, Q =  wi (Yi - w)2, is used as the basis of the DL estimator, as its 1st moment takes the form E(Q) = (k-1) + 2 (S1 – (S2 / S1)), where Sr = wir, for r = 1,2. Isolating for 2 then yields the expression for the method of moments estimator of the between-trial variance

DL2 = max(0, (Q - k + 1) / (S1 – (S2 / S1)))

# References

1. Higgins JP, Green S (2009) Cochrane Handbook for systematic reviews of interventions, version 5.0.0. John Wiley & Sons.

2. DerSimonian L, Laird N (1986) Meta-analysis in clinical trials. Contr Clin Trials 7: 177-188.

3. Sidik K, Jonkman J (2005) Simple heterogeneity variance estimation for meta-analysis. Journal of Royal Statistical Society(C) 54: 367-384.
